# Supplementary material for: Epigenetic Targeting to Overcome Radioresistance in Head and Neck Cancer
Source: MDPI journal article supplement (doi:10.3390/cancers16040730), 2024-02-09

# Western Blot (Figure 5C)

SAS

1. Sham
2. Sham+GSKJ1
3. IR
4. IR+GSKJ1

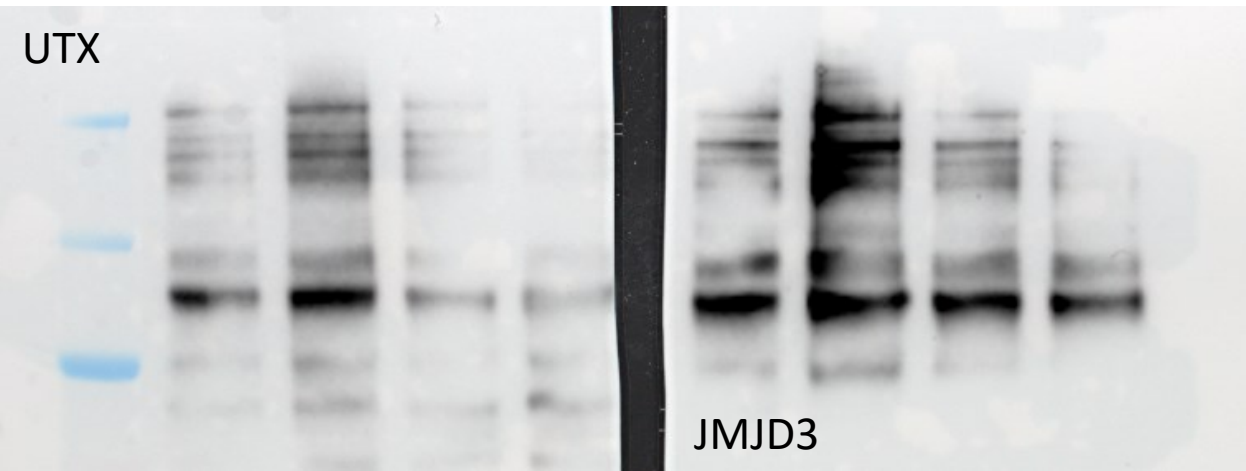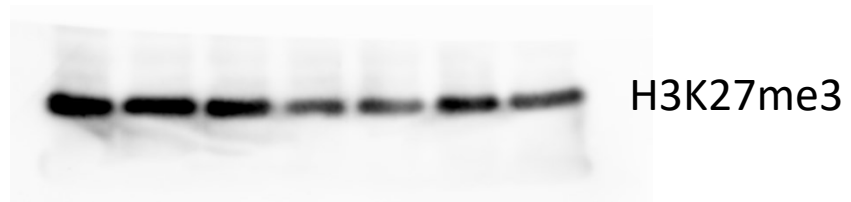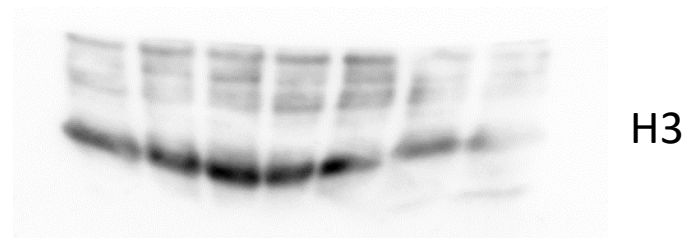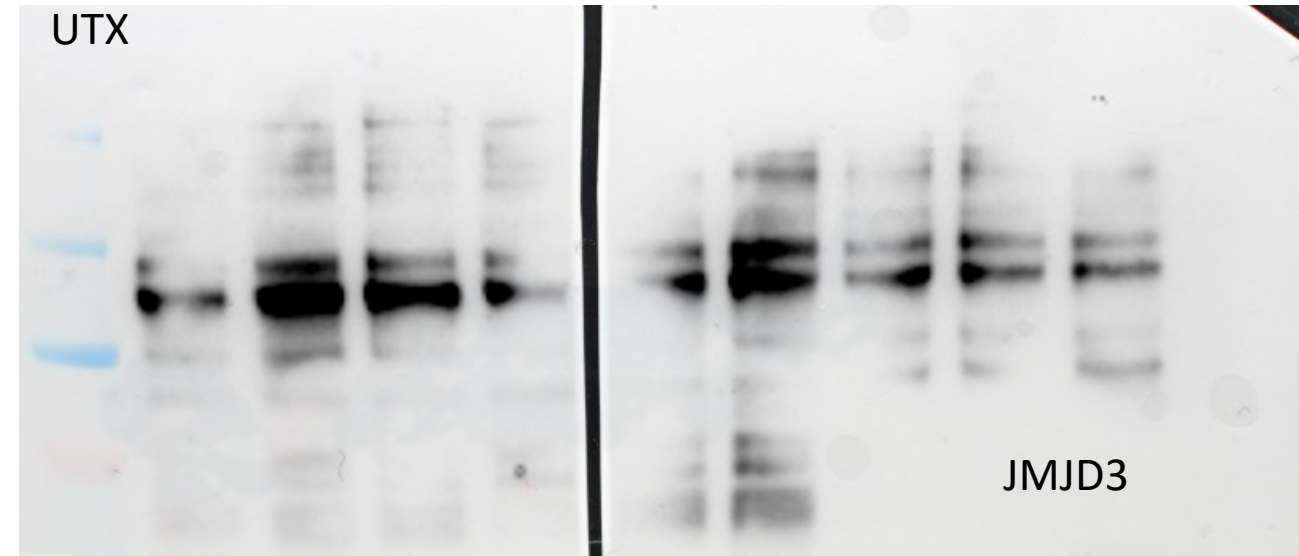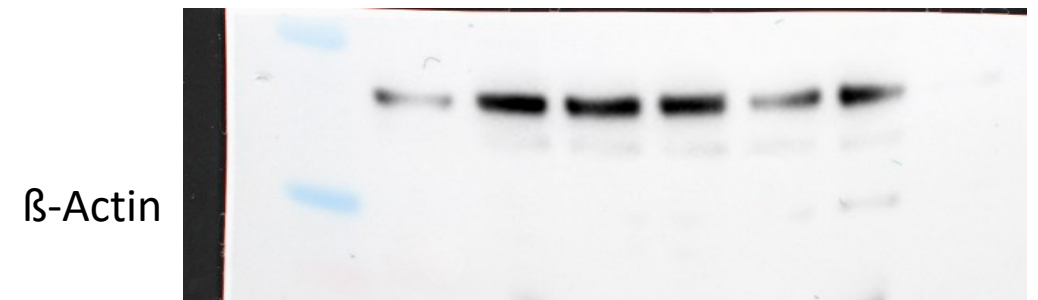

# Western Blot (Figure 5C)

Cal33, n1&2

H3

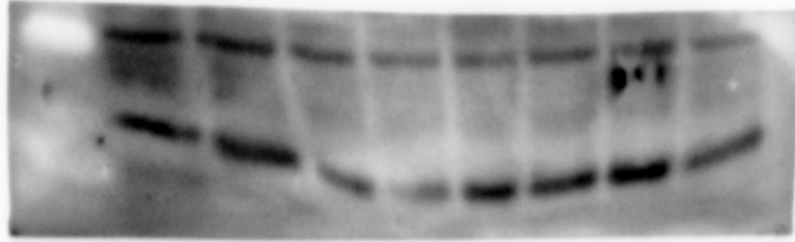

UTX

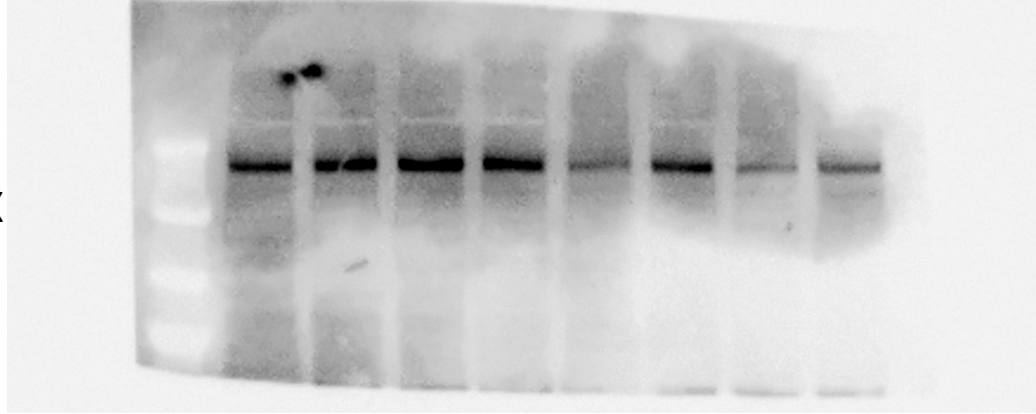

H3K27m3

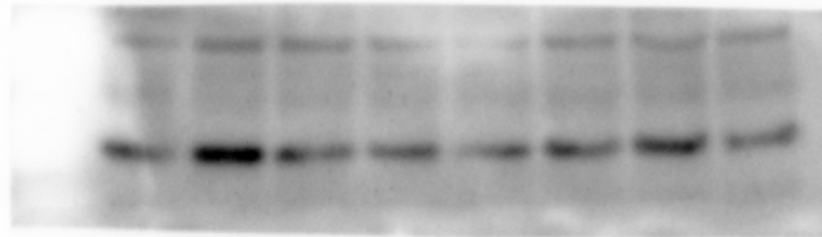

B-actin

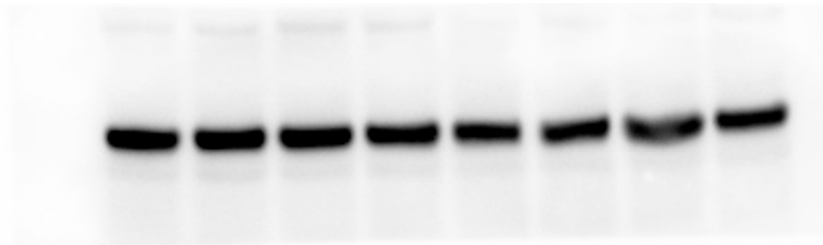

# Western Blot (Figure 5C)

n=3 Cal33+SAS

H3

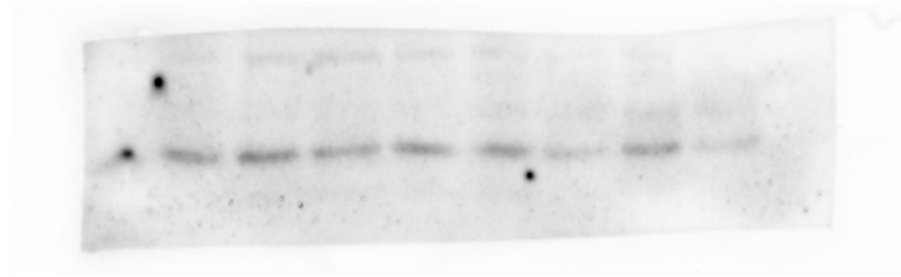

UTX

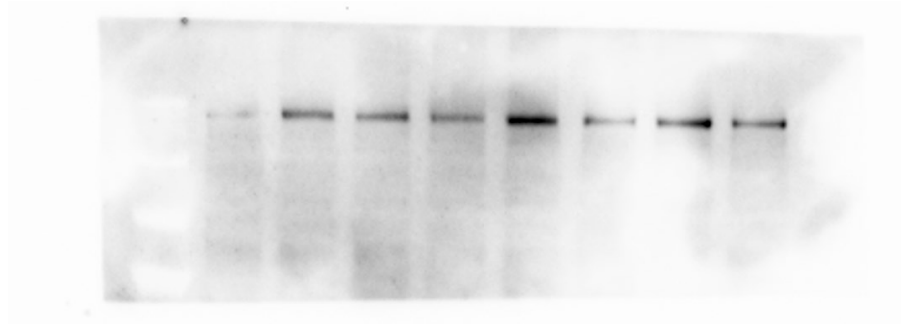

H3K27m3

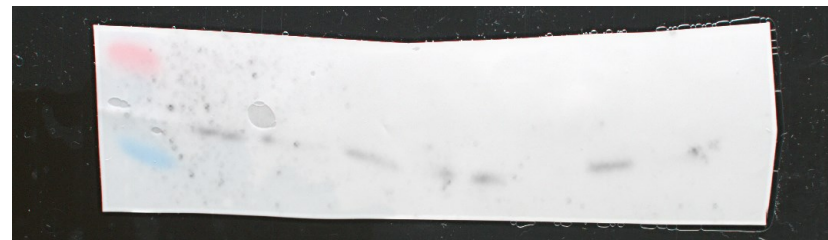

B-actin

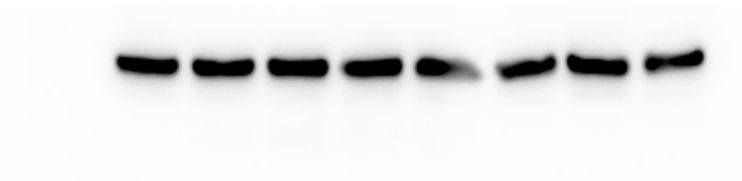

# Western Blot (Figure 5C)

SAS, n2, milk

UTX

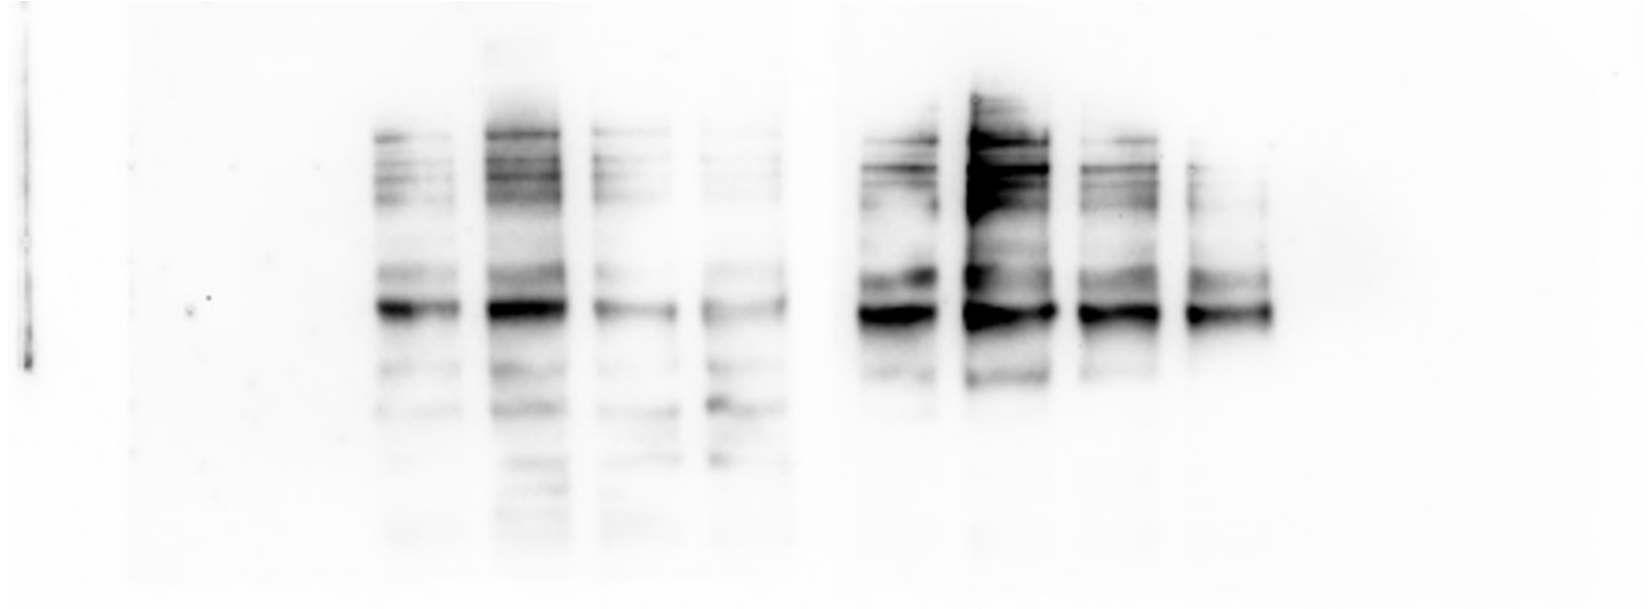

B-actin

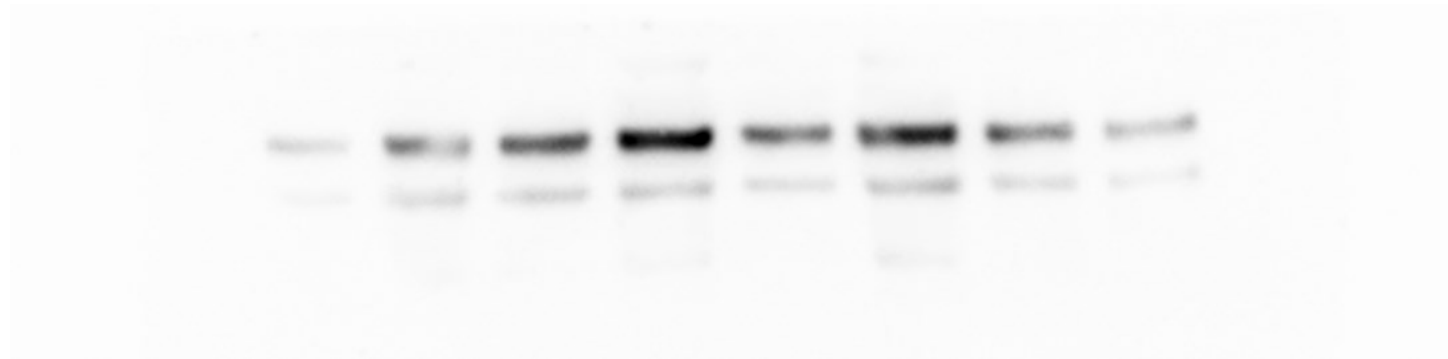

# Western Blot (Supplementary Figure S4B)

Cal33 (Lane5)

Lane: 1,2,3 = KDM6A

Lane: 7,8,9 = KDM6B

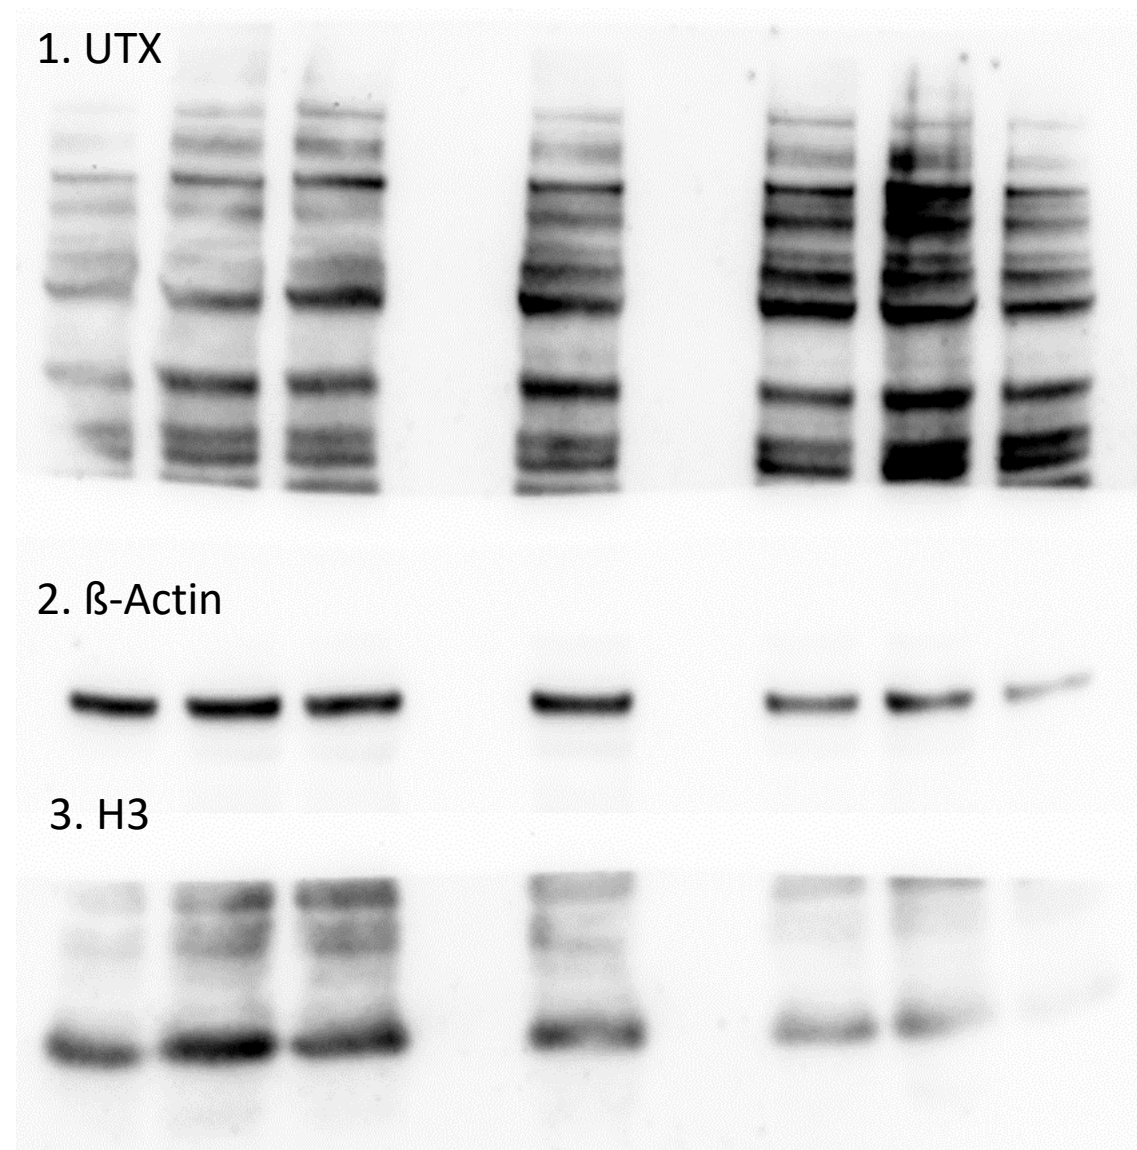

JMJD3

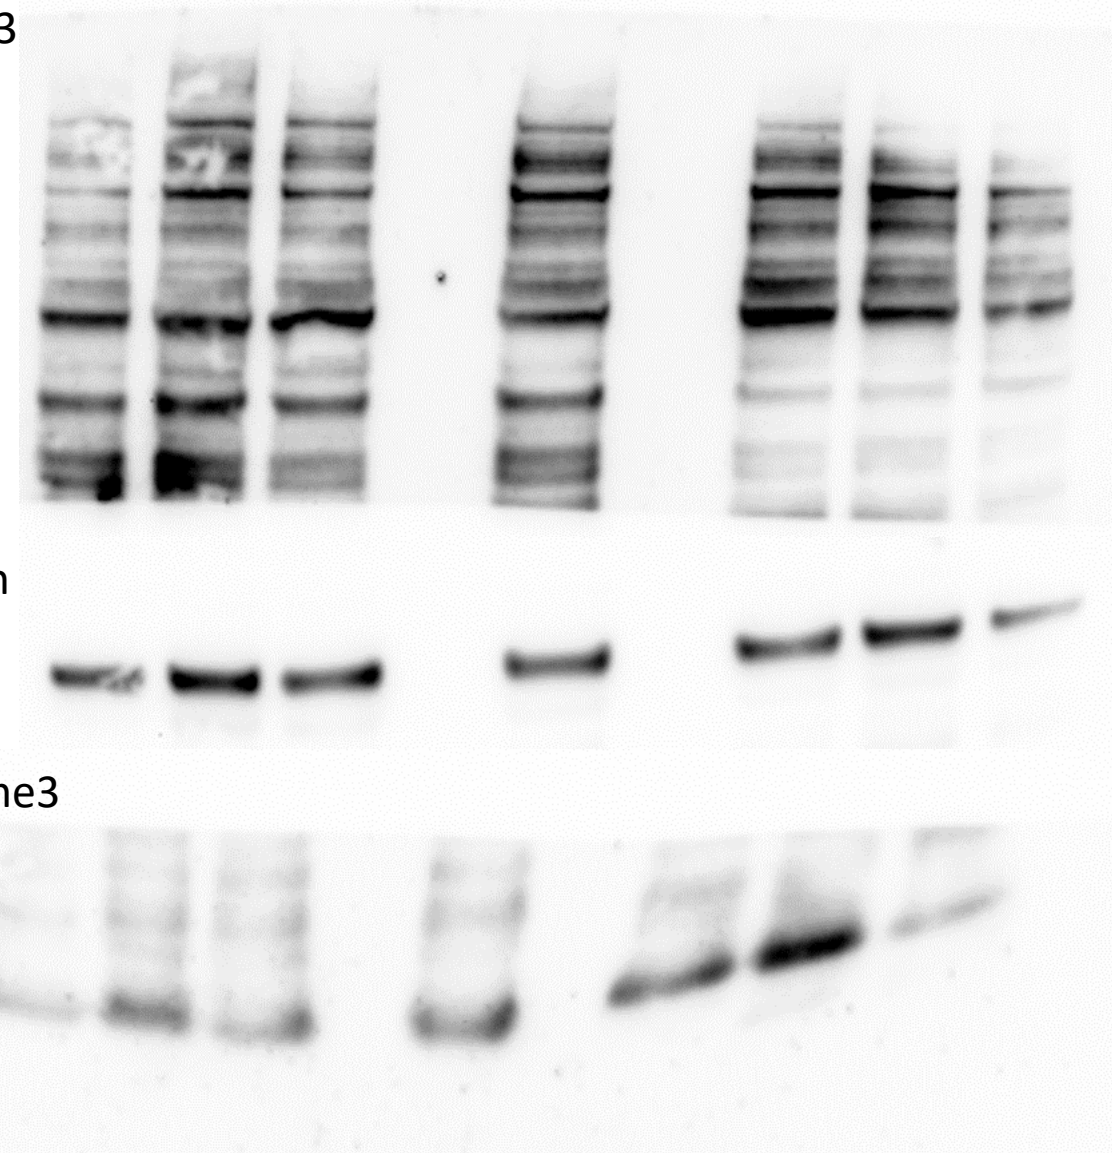



# Western Blot (Supplementary Figure S4B)

Cal33 (Lane5)

Lane: 1,2,3 = KDM6A

Lane: 7,8,9 = KDM6B

1. UTX

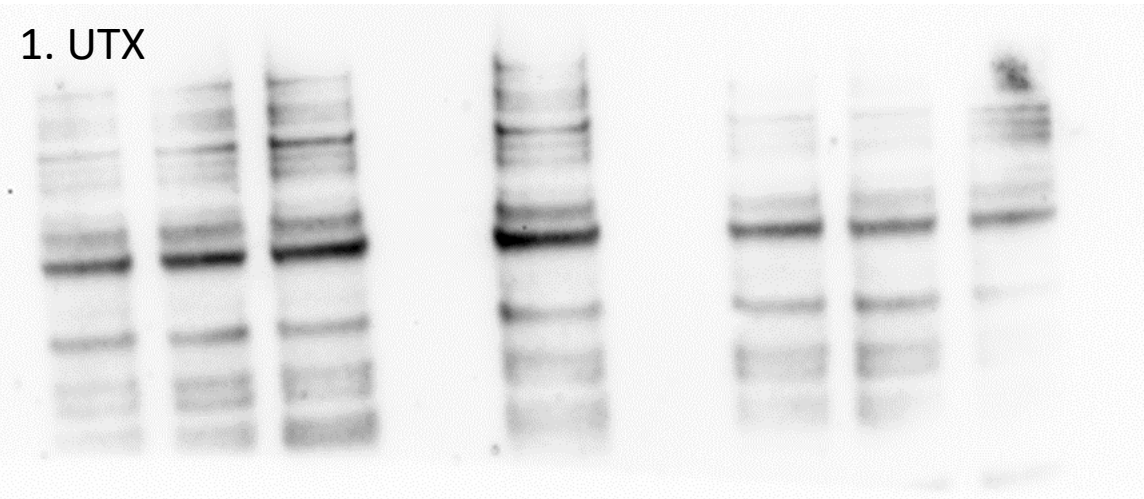

2.  $\beta$ -Actin

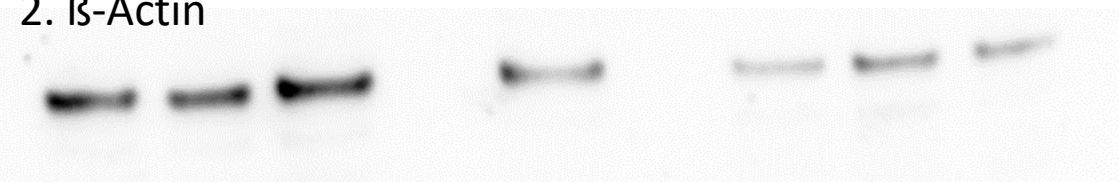

3. H3

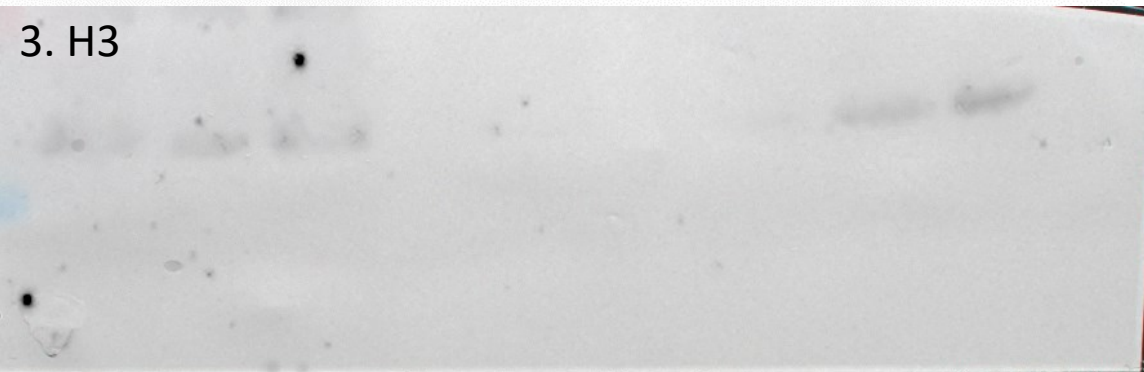

JMJD3

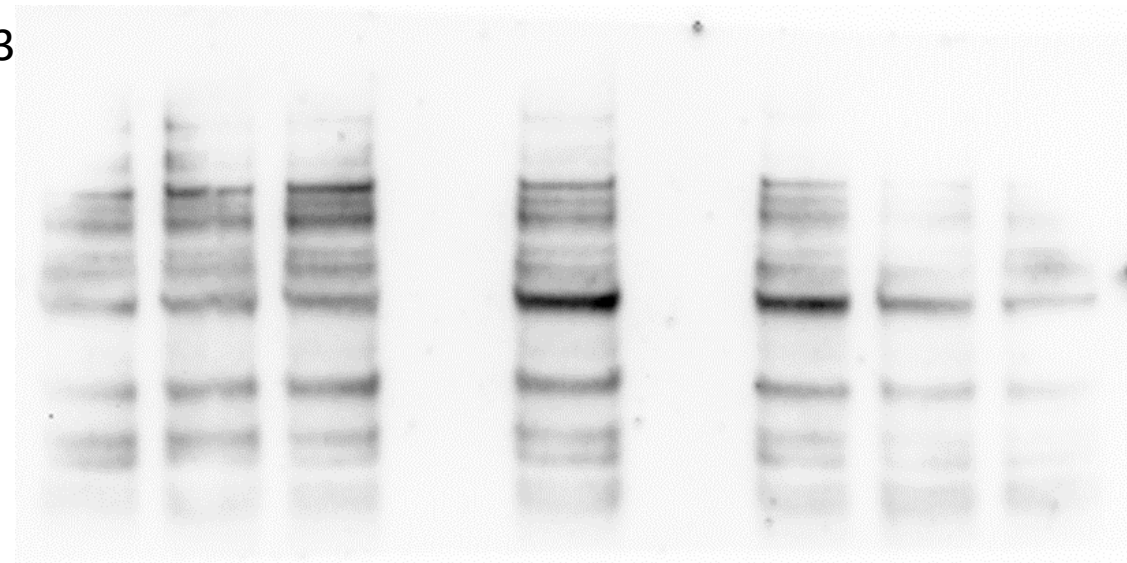

$\beta$ -Actin

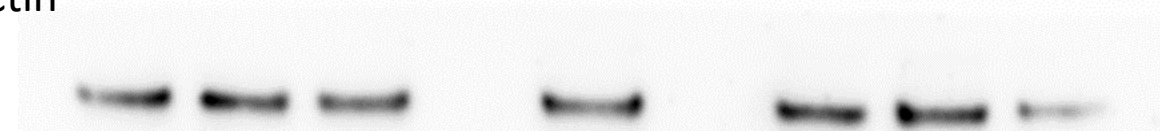

H3k27me3

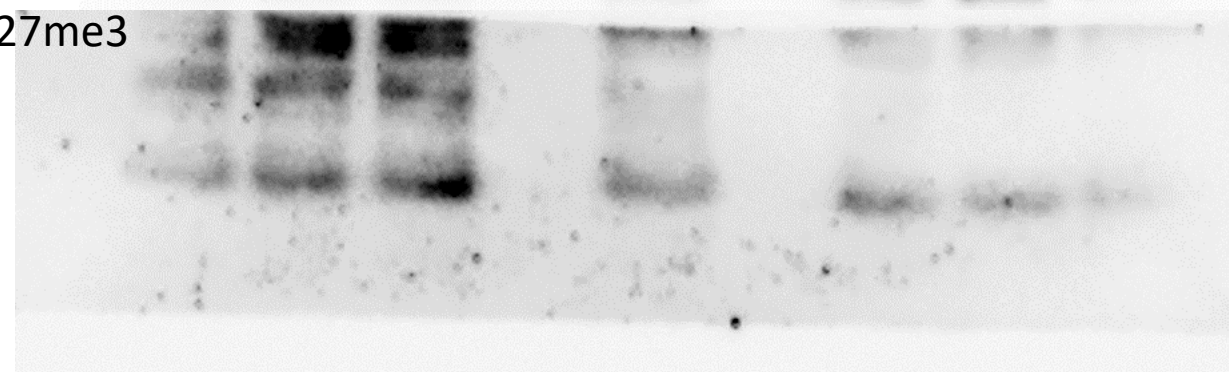

# Western Blot (Supplementary Figure S4B)

Cal33, n1

H3

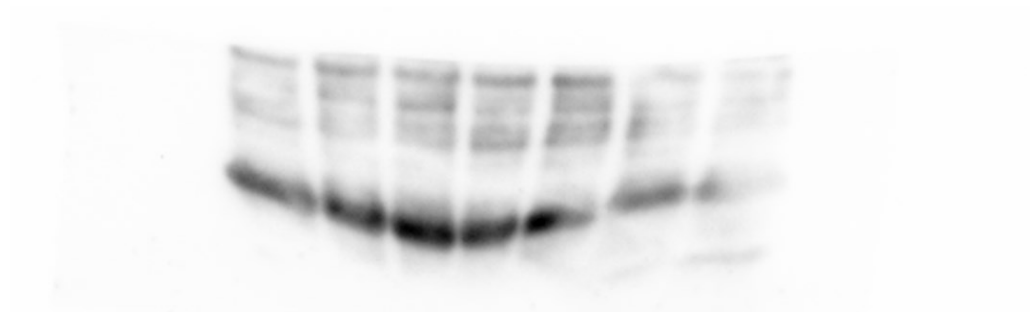

UTX

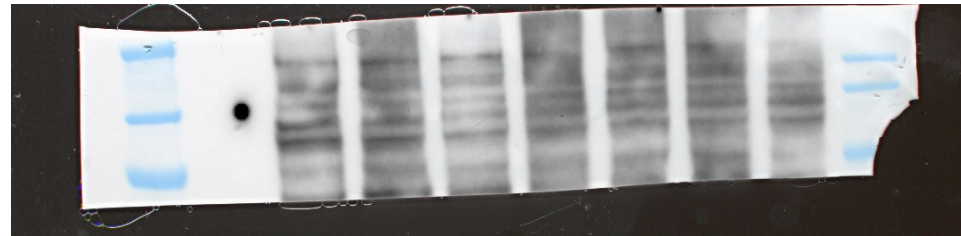

JMJD3

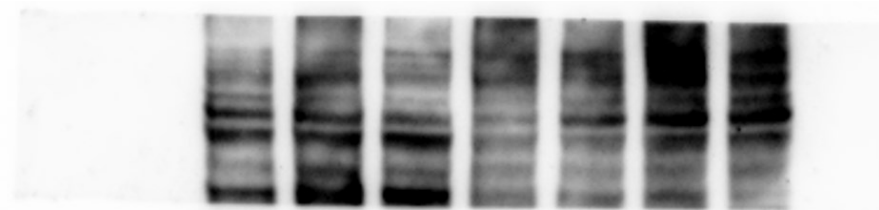

H3K27m3

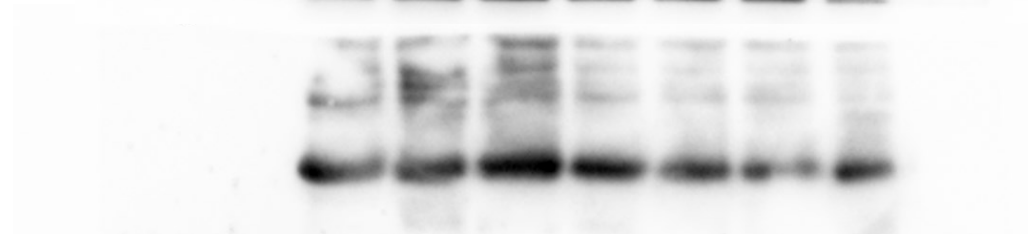

B-actin

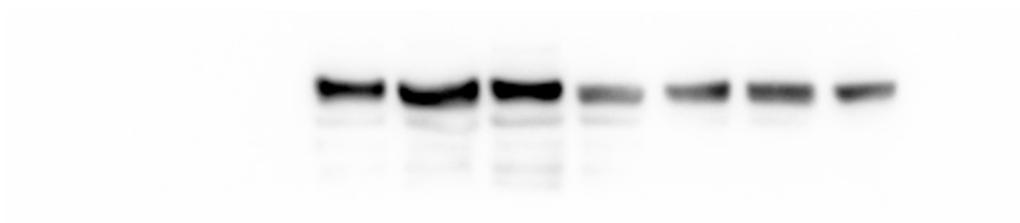

# Western Blot (Supplementary Figure S4B)

Cal33, n2

H3

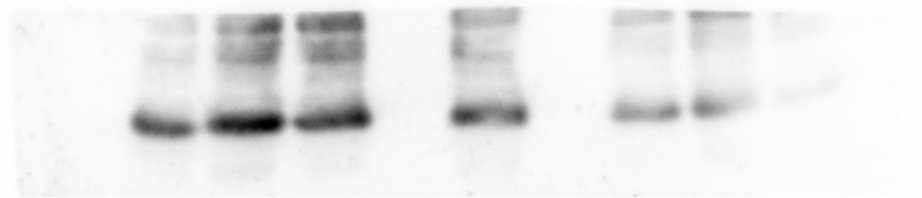

UTX

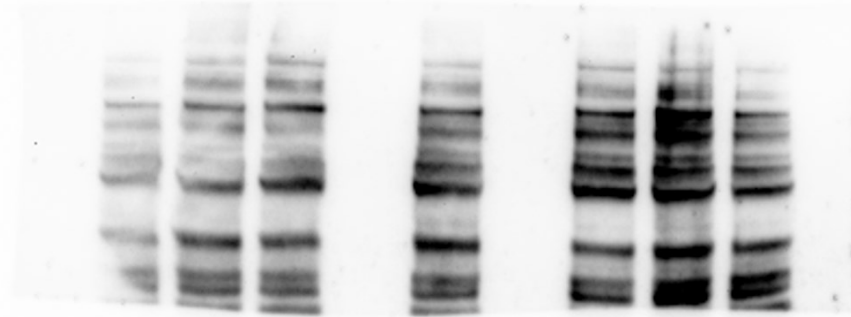

JMJD3

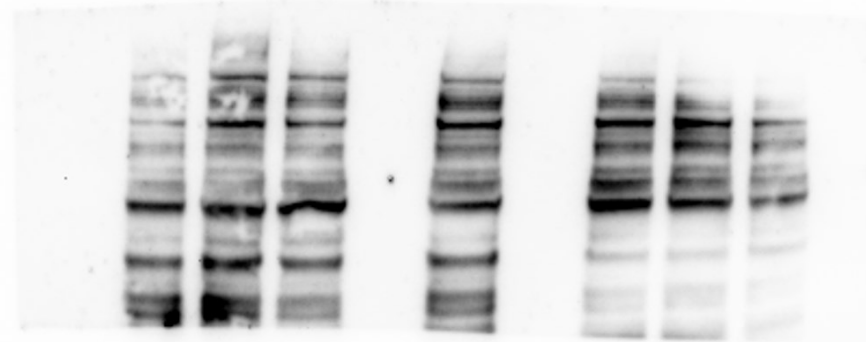

H3K27m3

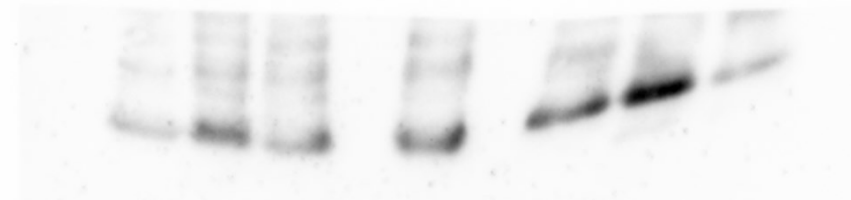

B-actin

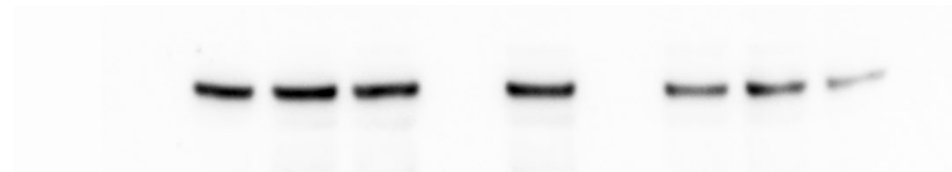



# Western Blot (Supplementary Figure S4B)

Cal33, n3

H3

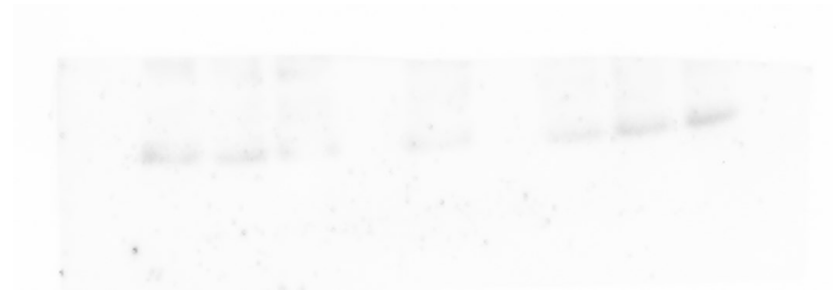

UTX

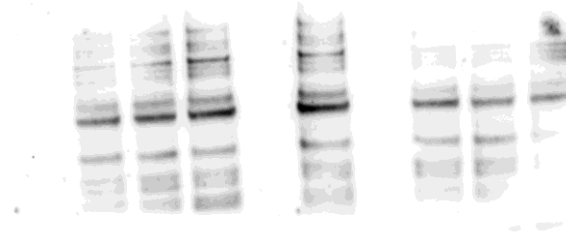

JMJD:

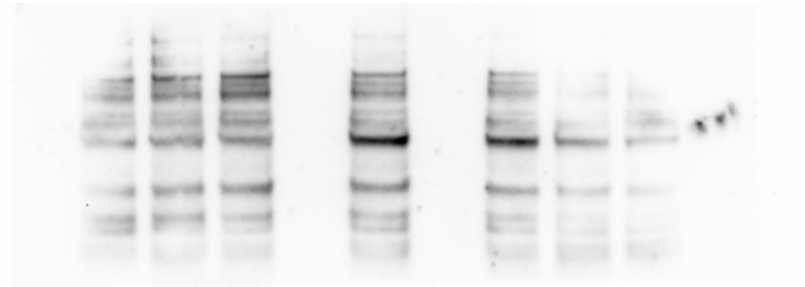

H3K27m3

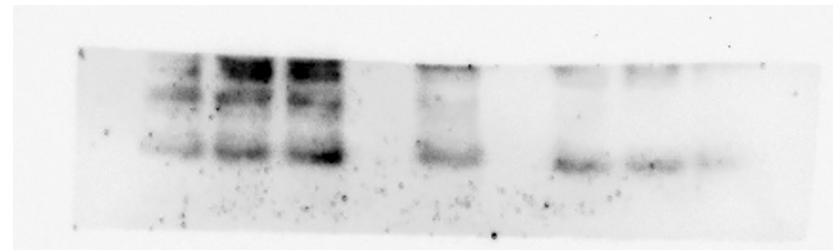

B-actin

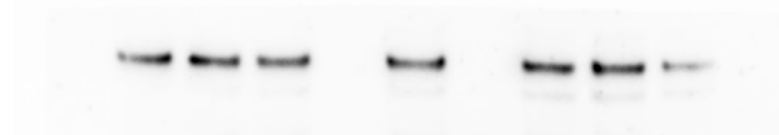

KDM6A-Composite

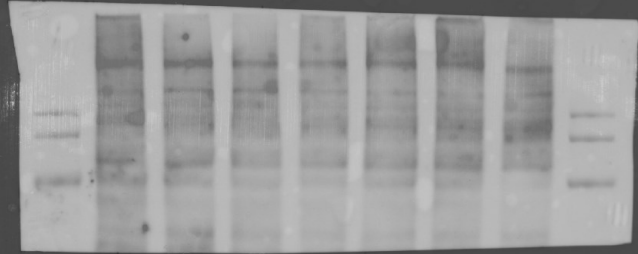

KDM6B-Composite

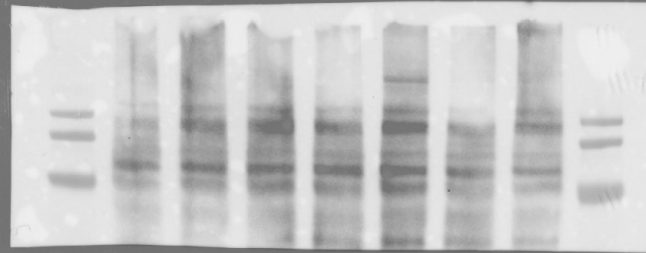

H3-Composite

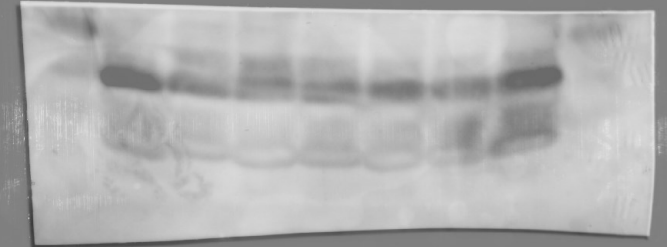

KDM6A-Chemiluminescence

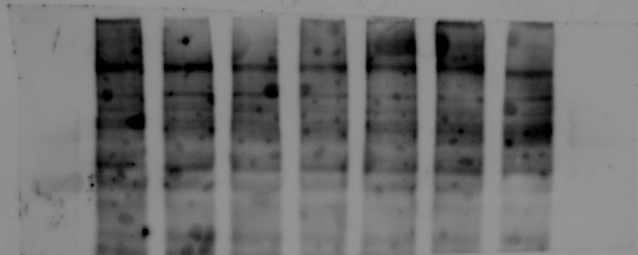

KDM6B-Chemiluminescence

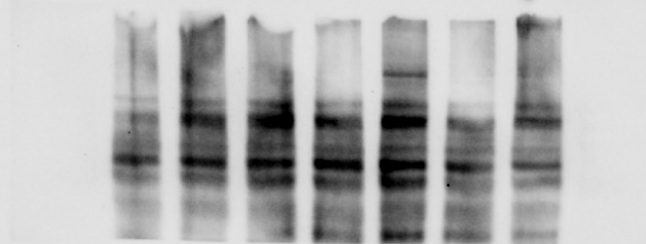

H3-Chemiluminescence

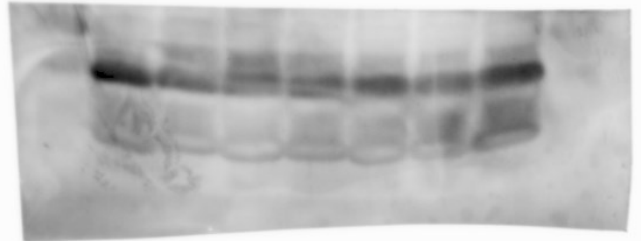

**Western Blot (Supplementary Figure S4B)**  
SAS, n2

B-Actin-Membran2-Composite

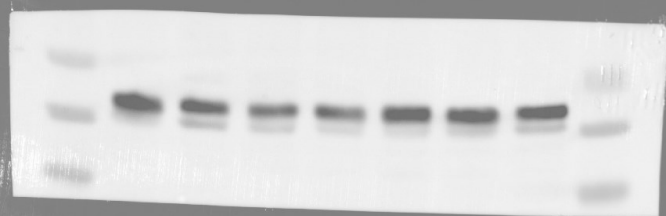

B-Actin-Membran1-Composite

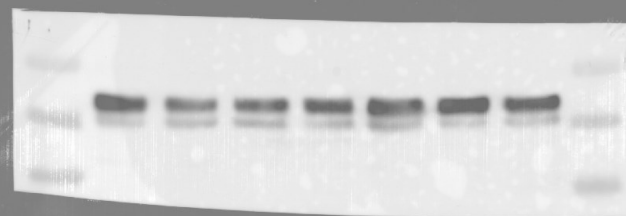

H3K27me3-Composite

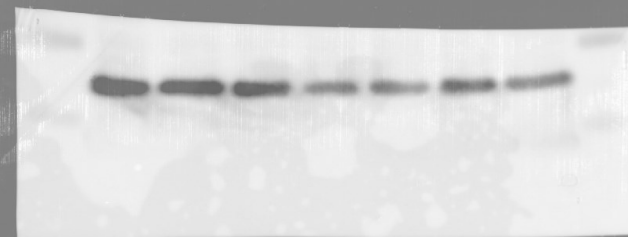

B-Actin-Membran2-Chemiluminescence

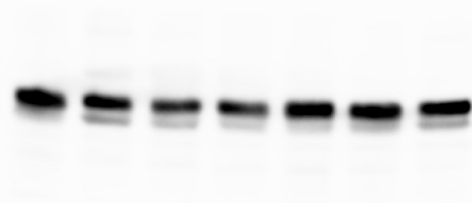

B-Actin-Membran1-Chemiluminescence

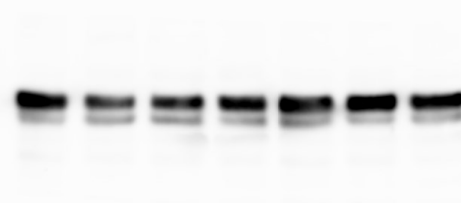

H3K27me3-Chemiluminescence

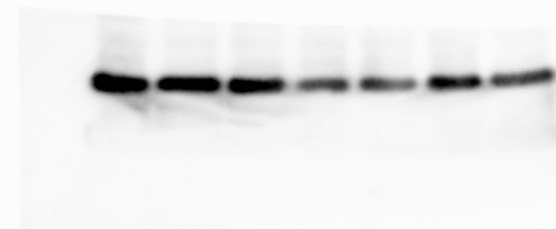

**Western Blot (Supplementary Figure S4B)**  
SAS, n2

# Western Blot (Supplementary Figure S4B)

SAS, n4

H3

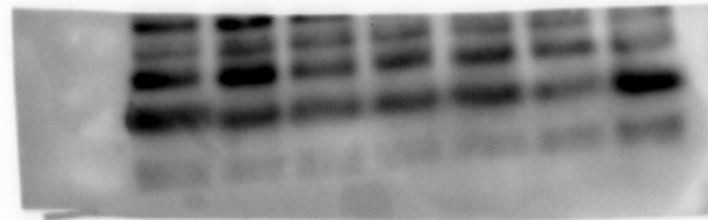

UTX

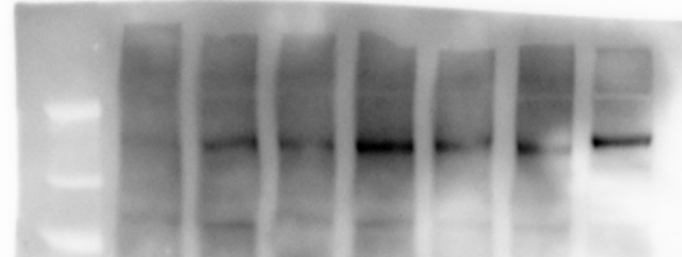

JMJD3

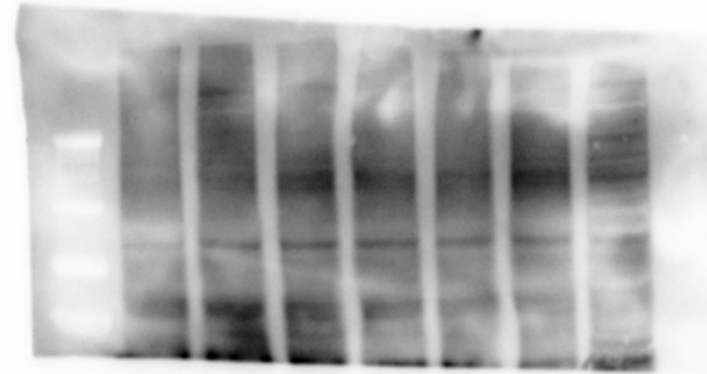

H3K27m3

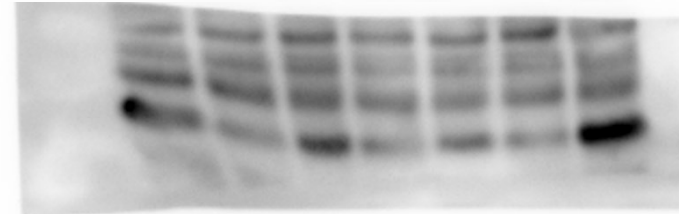

B-actin

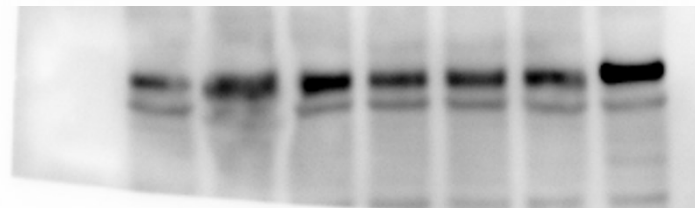

Western Blot (Supplementary Figure S1A)

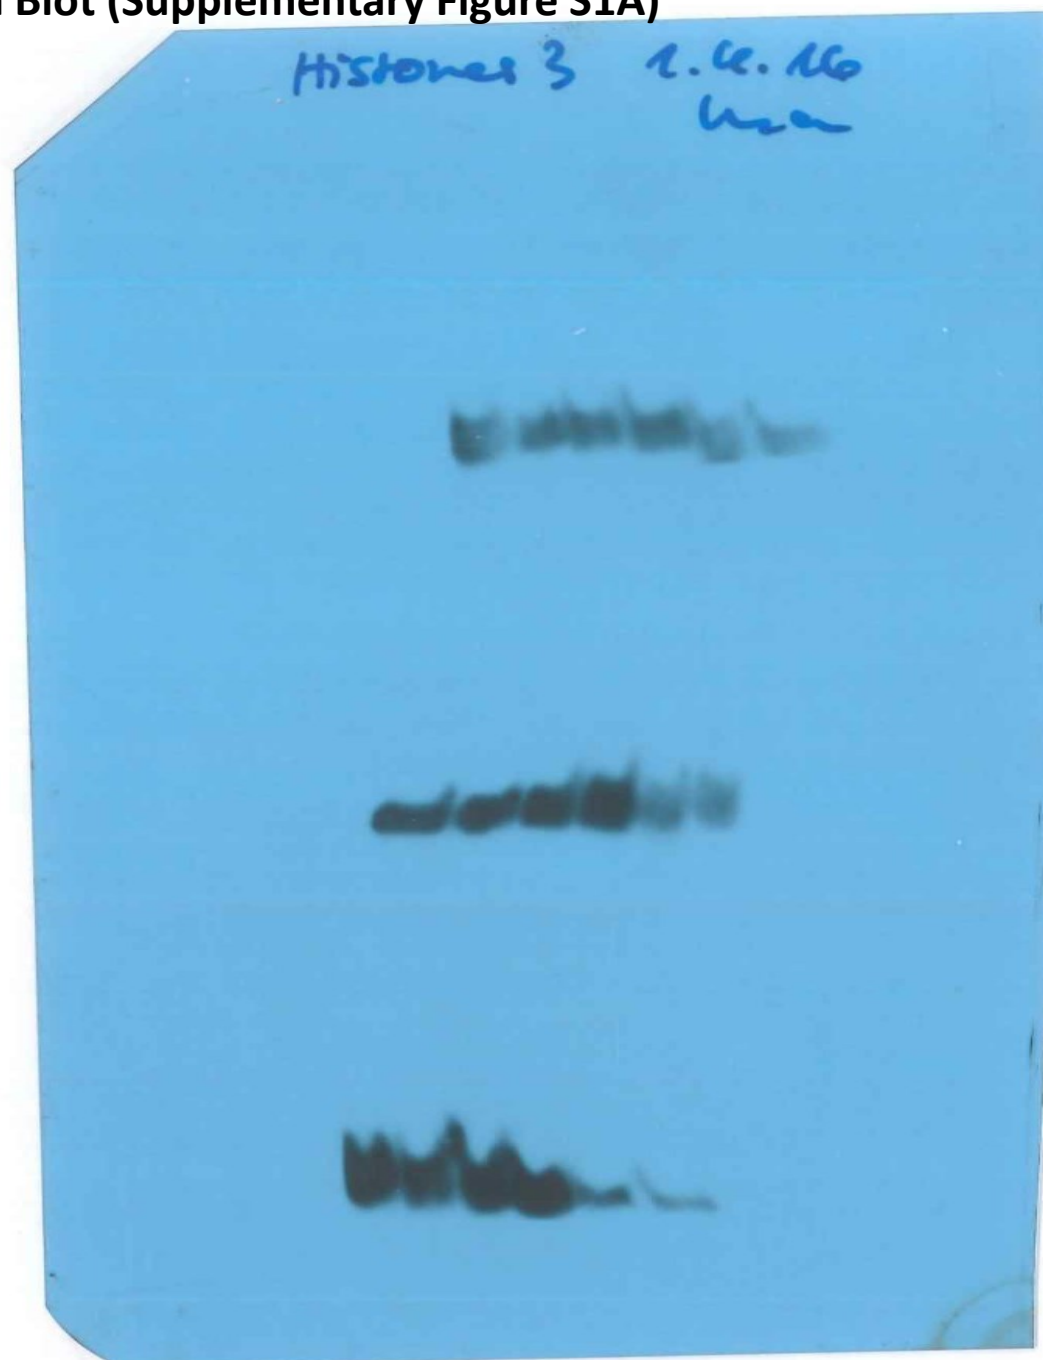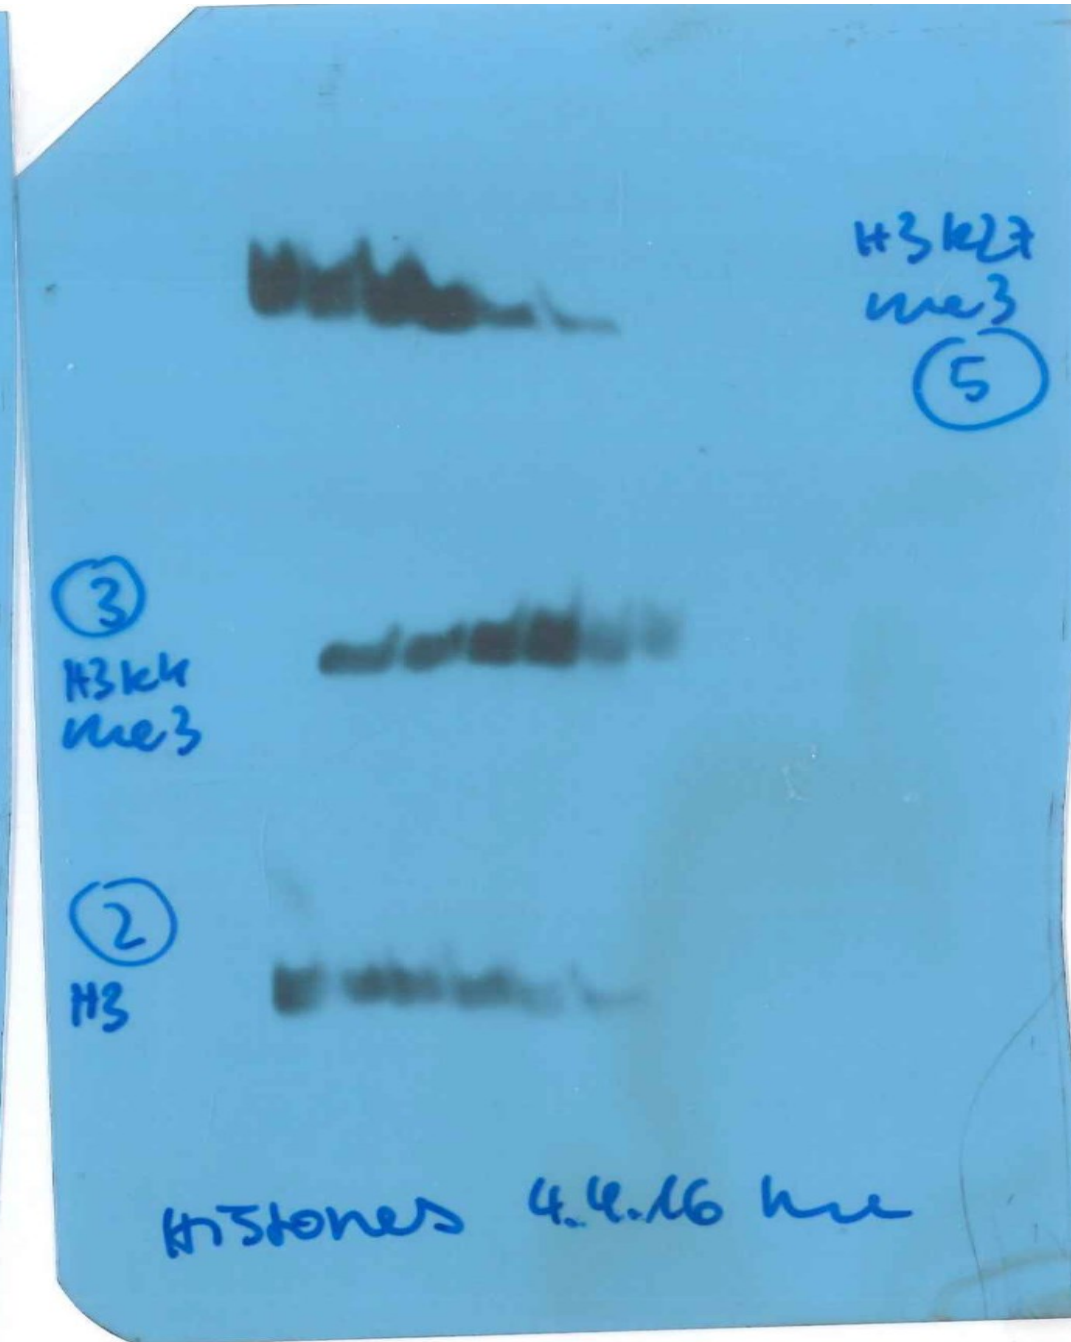

# Western Blot (Supplementary Figure S1A)

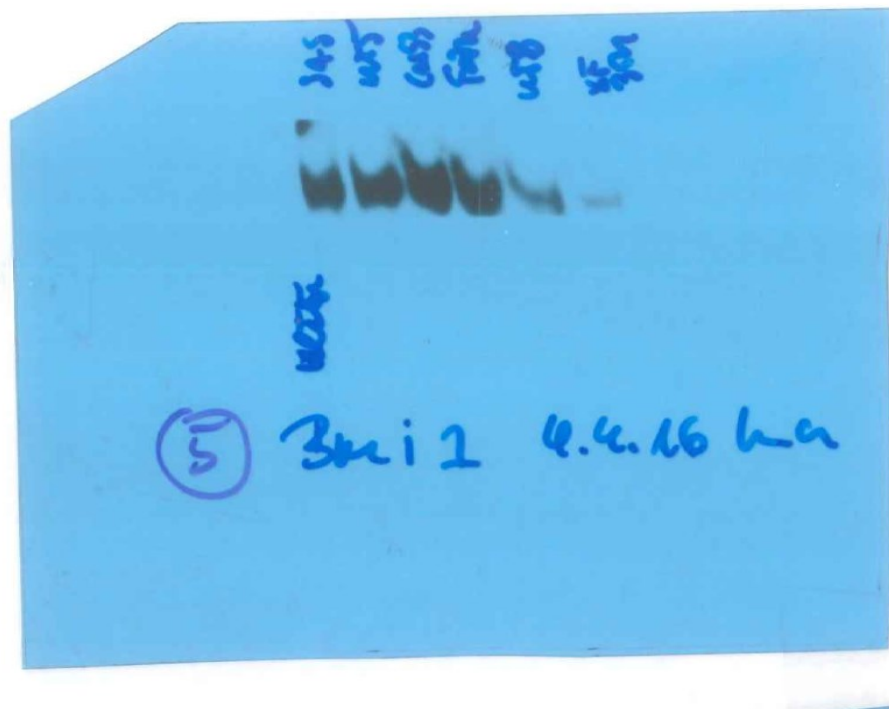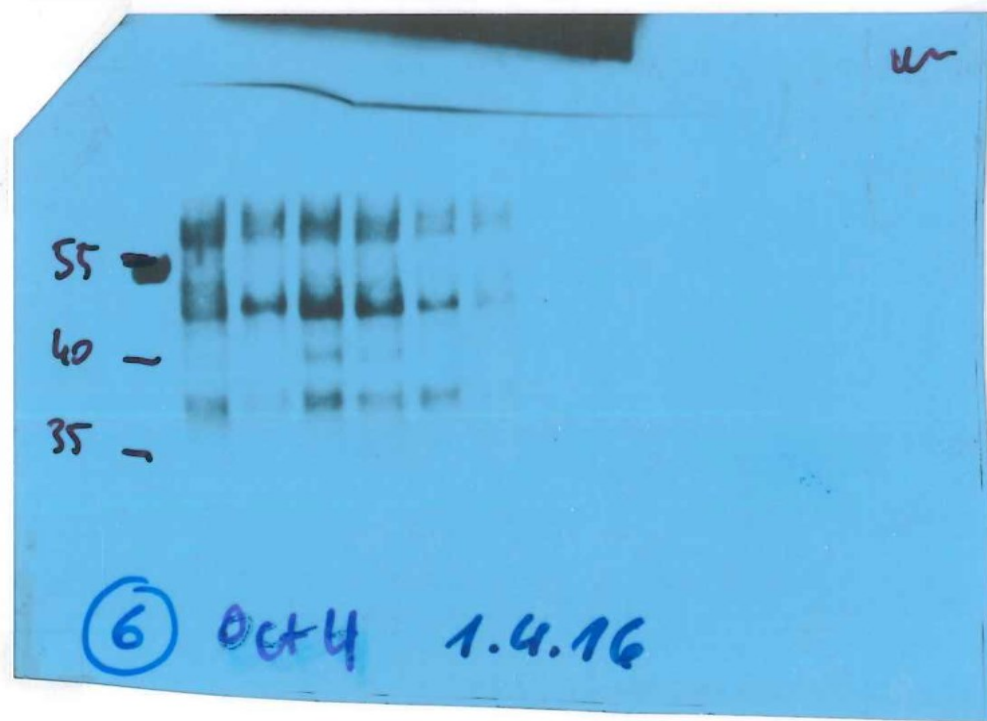



# Western Blot (Supplementary Figure S1A)

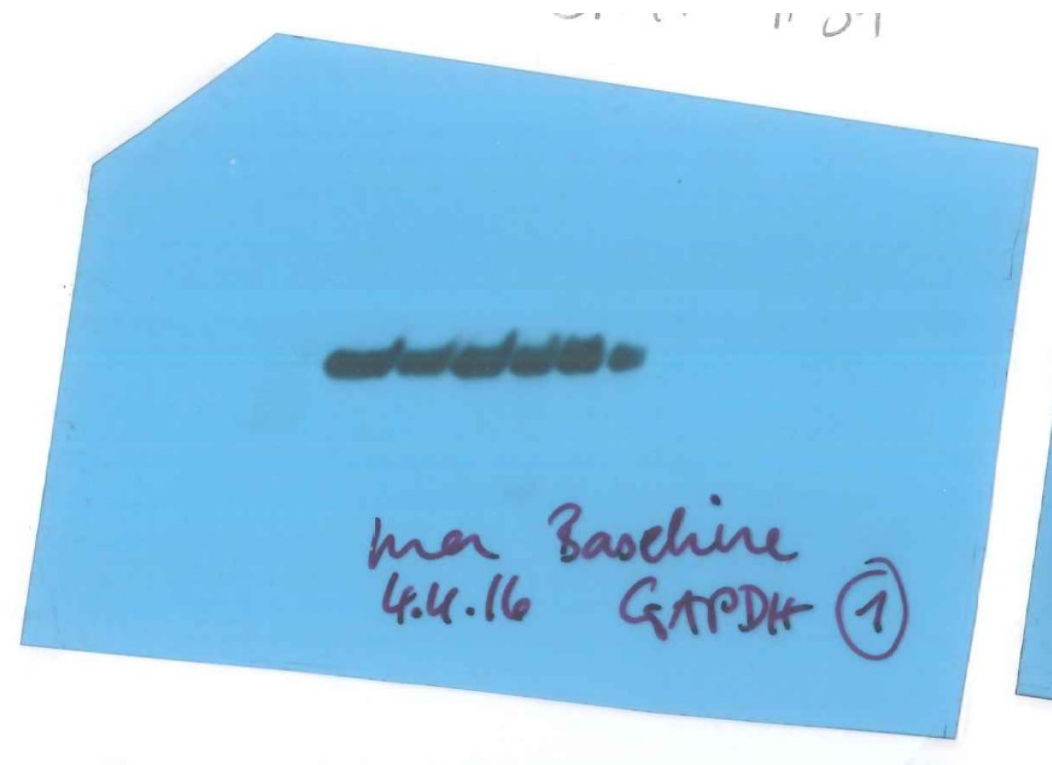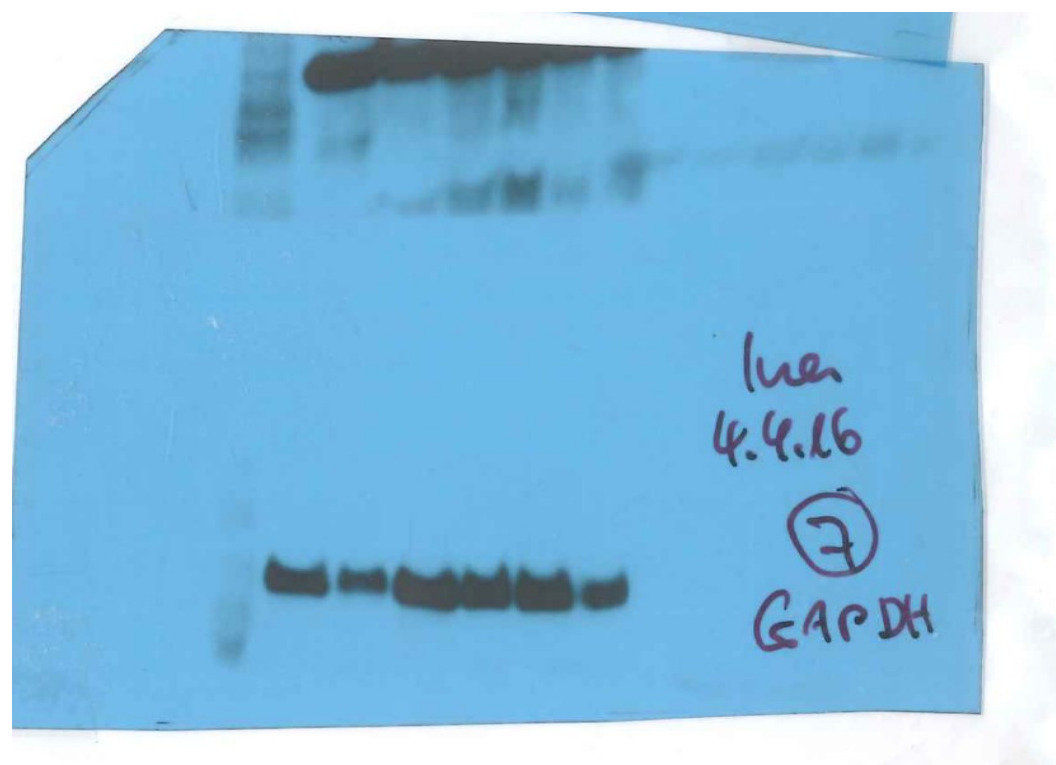

Supplement: s1 [file s1]
