# Supplementary material for: Epigenetic Targeting to Overcome Radioresistance in Head and Neck Cancer
Source: Cancers (Basel). 2024 Feb 9;16(4):730. doi: 10.3390/cancers16040730 (PMC10886471; doi:10.3390/cancers16040730)
Supplement: Supplementary file 1 [file cancers-16-00730-s001.zip › Supplementary Table S2_Differential DNA methylation_promoter regions.xlsx]

## Sheet: Cal33_ALDH_Promoter_hyper
id	Chromosome	Start	End	symbol	entrezID	mean.mean.diff	comb.p.adj.fdr
ENSG00000227232	chr1	29307	31306	WASH7P	653635;100287171	0.02314	0.968423
ENSG00000243485	chr1	28054	30053	MIR1302-10;MIR1302-11;MIR1302-2;MIR1302-9	100302278;100422831;100422834;100422919	0.02314	0.968423
ENSG00000186092	chr1	67591	69590	OR4F5	79501	0.0226486	0.968423
ENSG00000239664	chr1	532379	534378			0.0377768	0.968423
ENSG00000225972	chr1	562942	564941	MTND1P23		0.0039398	0.968423
ENSG00000225630	chr1	563520	565519	MTND2P28		0.00389616	0.968423
ENSG00000224956	chr1	663028	665027			0.0109589	0.968423
ENSG00000229905	chr1	694791	696790			0.00716603	0.968423
ENSG00000225880	chr1	762403	764402	LINC00115	79854;101927535	0.00617938	0.968423
ENSG00000228794	chr1	761488	763487	LINC01128	643837	0.00626925	0.968423
ENSG00000230368	chr1	811784	813783	FAM41C	284593	0.016755	0.968423
ENSG00000234711	chr1	807172	809171	TUBB8P11		0.0170067	0.968423
ENSG00000272438	chr1	838714	840713			0.0174754	0.968423
ENSG00000241180	chr1	848051	850050			0.0212904	0.968423
ENSG00000187634	chr1	858760	860759	SAMD11	148398	0.0150525	0.968423
ENSG00000188976	chr1	894190	896189	NOC2L	26155	0.0075164	0.968423
ENSG00000187961	chr1	894467	896466	KLHL17	339451	0.0071592	0.968423
ENSG00000188290	chr1	935053	937052	HES4	57801	0.00235275	0.968423
ENSG00000231702	chr1	943110	945109			0.00703769	0.968423
ENSG00000188157	chr1	954003	956002	AGRN	375790	0.00780084	0.968423
ENSG00000237330	chr1	1009188	1011187	RNF223	401934	0.0100561	0.968423
ENSG00000131591	chr1	1051242	1053241	C1orf159	54991	0.00254142	0.968423
ENSG00000272141	chr1	1103237	1105236			0.00562893	0.968423

## Sheet: Cal33_ALDH_Promoter_hypo
id	Chromosome	Start	End	symbol	entrezID	mean.mean.diff	comb.p.adj.fdr
ENSG00000223972	chr1	10369	12368	DDX11L1	100287102;100287596	-0.000989899	0.968423
ENSG00000223659	chr1	563891	565890		101928626	-0.000668438	0.968423
ENSG00000237973	chr1	564954	566953		101926970;102465432	-0.00515225	0.968423
ENSG00000229344	chr1	566637	568636			-0.00417445	0.968423
ENSG00000240409	chr1	567415	569414	MTATP8P1		-0.00538749	0.968423
ENSG00000248527	chr1	567576	569575	MTATP6P1		-0.00711967	0.968423
ENSG00000198744	chr1	568256	570255		101929612	-0.00262883	0.968423
ENSG00000228327	chr1	713507	715506		100288069;101929540	-0.00240457	0.968423
ENSG00000237491	chr1	712650	714649		100287934;101930657	-0.00240457	0.968423
ENSG00000230092	chr1	745042	747041			-0.0180539	0.968423
ENSG00000269831	chr1	738638	740637			-0.00662102	0.968423
ENSG00000240453	chr1	752593	754592			-0.0157233	0.968423
ENSG00000177757	chr1	751251	753250	FAM87B	400728	-0.00598238	0.968423
ENSG00000223764	chr1	855897	857896			-0.0128676	0.968423
ENSG00000268179	chr1	865946	867945			-0.0147839	0.968423
ENSG00000187583	chr1	900377	902376	PLEKHN1	84069	-0.0221305	0.968423
ENSG00000187642	chr1	916998	918997	C1orf170	84808	-0.00831194	0.968423
ENSG00000272512	chr1	932932	934931			-0.0291156	0.968423
ENSG00000224969	chr1	948074	950073			-0.0192738	0.968423
ENSG00000187608	chr1	947303	949302	ISG15	9636	-0.00381294	0.968423
ENSG00000242590	chr1	988913	990912			-0.00419396	0.968423
ENSG00000217801	chr1	993614	995613		100288175	-0.00524344	0.968423
ENSG00000273443	chr1	998169	1000168			-0.00281276	0.968423
ENSG00000223823	chr1	1070897	1072896		254099	-0.0182314	0.968423
ENSG00000207730	chr1	1100984	1102983	MIR200B	406984	-0.00845885	0.968423
ENSG00000207607	chr1	1101743	1103742	MIR200A	406983	-0.011512	0.968423
ENSG00000198976	chr1	1102885	1104884	MIR429	554210	-0.000416856	0.968423

## Sheet: FaDu_ALDH_Promoter_hyper
id	Chromosome	Start	End	symbol	entrezID	mean.mean.diff	comb.p.adj.fdr
ENSG00000227232	chr1	29307	31306	WASH7P	653635;100287171	0.0224164	0.804986
ENSG00000243485	chr1	28054	30053	MIR1302-10;MIR1302-11;MIR1302-2;MIR1302-9	100302278;100422831;100422834;100422919	0.0224164	0.804986
ENSG00000228327	chr1	713507	715506		100288069;101929540	0.00501817	0.804986
ENSG00000237491	chr1	712650	714649		100287934;101930657	0.00501817	0.804986
ENSG00000272438	chr1	838714	840713			0.0115113	0.804986
ENSG00000230699	chr1	845315	847314		284600	0.0125654	0.804986
ENSG00000241180	chr1	848051	850050			0.00962986	0.804986
ENSG00000187634	chr1	858760	860759	SAMD11	148398	0.00678268	0.804986
ENSG00000187583	chr1	900377	902376	PLEKHN1	84069	0.00843846	0.804986
ENSG00000187642	chr1	916998	918997	C1orf170	84808	0.0326826	0.804986
ENSG00000272512	chr1	932932	934931			0.00150299	0.804986
ENSG00000188290	chr1	935053	937052	HES4	57801	0.00229195	0.804986
ENSG00000237330	chr1	1009188	1011187	RNF223	401934	0.0226602	0.804986
ENSG00000131591	chr1	1051242	1053241	C1orf159	54991	0.00838027	0.804986
ENSG00000207730	chr1	1100984	1102983	MIR200B	406984	9.12615e-05	0.804986
ENSG00000184163	chr1	1181603	1183602	FAM132A	388581	0.0201194	0.804986
ENSG00000160087	chr1	1208766	1210765	UBE2J2	118424	0.00213341	0.804986
ENSG00000230415	chr1	1209103	1211102			0.00213341	0.804986
ENSG00000162572	chr1	1214316	1216315	SCNN1D	6339	0.00469543	0.804986
ENSG00000131584	chr1	1244490	1246489	ACAP3	116983	0.00616127	0.804986
ENSG00000169972	chr1	1242447	1244446	PUSL1	126789	0.00585643	0.804986
ENSG00000240731	chr1	1253570	1255569			0.0366078	0.804986
ENSG00000224051	chr1	1258636	1260635	GLTPD1	80772	0.000243791	0.804986

## Sheet: FaDu_ALDH_Promoter_hypo
id	Chromosome	Start	End	symbol	entrezID	mean.mean.diff	comb.p.adj.fdr
ENSG00000223972	chr1	10369	12368	DDX11L1	100287102;100287596	-0.00958279	0.804986
ENSG00000239664	chr1	532379	534378			-0.0175277	0.804986
ENSG00000240618	chr1	699806	701805			-0.0297394	0.804986
ENSG00000229905	chr1	694791	696790			-0.0304705	0.804986
ENSG00000230092	chr1	745042	747041			-0.0200761	0.804986
ENSG00000240453	chr1	752593	754592			-0.0233079	0.804986
ENSG00000177757	chr1	751251	753250	FAM87B	400728	-0.0295286	0.804986
ENSG00000225880	chr1	762403	764402	LINC00115	79854;101927535	-0.00388387	0.804986
ENSG00000228794	chr1	761488	763487	LINC01128	643837	-0.00367396	0.804986
ENSG00000230368	chr1	811784	813783	FAM41C	284593	-0.0179301	0.804986
ENSG00000234711	chr1	807172	809171	TUBB8P11		-0.0185549	0.804986
ENSG00000223764	chr1	855897	857896			-0.00319382	0.804986
ENSG00000187961	chr1	894467	896466	KLHL17	339451	-0.000811266	0.804986
ENSG00000231702	chr1	943110	945109			-0.0125632	0.804986
ENSG00000188157	chr1	954003	956002	AGRN	375790	-0.007603	0.804986
ENSG00000242590	chr1	988913	990912			-0.00753012	0.804986
ENSG00000217801	chr1	993614	995613		100288175	-0.00355768	0.804986
ENSG00000223823	chr1	1070897	1072896		254099	-0.000430036	0.804986
ENSG00000207607	chr1	1101743	1103742	MIR200A	406983	-0.00462563	0.804986
ENSG00000198976	chr1	1102885	1104884	MIR429	554210	-0.011046	0.804986
ENSG00000272141	chr1	1103237	1105236			-0.017611	0.804986
ENSG00000205231	chr1	1114436	1116435	TTLL10-AS1	100506376	-0.00296579	0.804986
ENSG00000162571	chr1	1107764	1109763	TTLL10	254173	-0.00116018	0.804986
ENSG00000186891	chr1	1141572	1143571	TNFRSF18	8784	-0.000210326	0.804986
ENSG00000186827	chr1	1149019	1151018	TNFRSF4	7293	-0.00248265	0.804986
ENSG00000078808	chr1	1166912	1168911	SDF4	51150	-0.00814939	0.804986
ENSG00000127054	chr1	1259572	1261571	CPSF3L	54973;102465435	-0.00245324	0.804986

## Sheet: Cal33_RR_Promoter_hyper
id	Chromosome	Start	End	symbol	entrezID	mean.mean.diff	comb.p.adj.fdr
ENSG00000155893	chr3	140946068	140948067	ACPL2	92370	0.345548	0.0520594
ENSG00000206774	chr5	79661152	79663151	RNU6-211P		0.321282	0.0520594
ENSG00000177590	chr7	150444317	150446316			0.577924	0.0520594
ENSG00000233569	chr9	120409384	120411383		101928797	0.014899	0.0520594
ENSG00000258170	chr12	82890840	82892839			0.37495	0.0520594
ENSG00000223383	chr13	37064079	37066078	HIST1H2APS6		0.4639	0.0520594
ENSG00000271232	chr15	69040340	69042339			0.592275	0.0520594
ENSG00000252432	chr18	5661550	5663549			0.295842	0.0520594
ENSG00000183586	chr1	152370553	152372552	HMGN3P1		0.182481	0.0544463
ENSG00000272865	chr1	242309316	242311315			0.203666	0.0544463
ENSG00000253504	chr8	36135905	36137904			0.457688	0.0544463
ENSG00000254384	chr8	36134978	36136977	MTND6P19		0.457688	0.0544463
ENSG00000221581	chr9	83348745	83350744			0.314987	0.0544463
ENSG00000269540	chr19	50562990	50564989			0.261935	0.0544463
ENSG00000200664	chr2	136567350	136569349			0.227721	0.0576469
ENSG00000253146	chr5	153939501	153941500	CIR1P1		0.296395	0.0633193
ENSG00000248777	chr4	10201797	10203796			0.227319	0.0646196
ENSG00000227883	chr1	48014368	48016367	ATP6V0E1P4		0.233755	0.0657428

## Sheet: Cal33_RR_Promoter_hypo
id	Chromosome	Start	End	symbol	entrezID	mean.mean.diff	comb.p.adj.fdr
ENSG00000236570	chr3	18578665	18580664	RAD23BP1		-0.685937	0.0428099
ENSG00000243650	chr2	231370316	231372315	RN7SL834P		-0.2777	0.0520594
ENSG00000249215	chr5	138872341	138874340			-0.310178	0.0520594
ENSG00000272239	chr5	146779823	146781822			-0.271918	0.0520594
ENSG00000213183	chr6	97096446	97098445	RPS7P8		-0.352144	0.0520594
ENSG00000207309	chr6	97096968	97098967	RNU4-70P		-0.352144	0.0520594
ENSG00000266807	chr6	132111812	132113811	MIR548H5	100616455	-0.34674	0.0520594
ENSG00000254082	chr8	39422724	39424723		100130964	-0.433687	0.0520594
ENSG00000205293	chr8	58889417	58891416			-0.337207	0.0520594
ENSG00000238882	chr9	105017386	105019385	RNU6-329P		-0.271142	0.0520594
ENSG00000272381	chr10	31475312	31477311		101929352	-0.524047	0.0520594
ENSG00000176904	chr11	4881295	4883294	OR51H1P		-0.287569	0.0520594
ENSG00000258196	chr14	32027205	32029204			-0.349635	0.0520594
ENSG00000243521	chr17	48923811	48925810	RPL5P33		-0.302891	0.0520594
ENSG00000266952	chr18	61926791	61928790		400654	-0.615153	0.0520594
ENSG00000212497	chr19	12138337	12140336	RNA5SP465		-0.320915	0.0520594
ENSG00000267815	chr19	50813297	50815296			-0.282896	0.0520594
ENSG00000273366	chr22	42672694	42674693			-0.31636	0.0520594
ENSG00000259660	chr15	102289735	102291734	DNM1P47		-0.0195835	0.0524174
ENSG00000203442	chr19	35331619	35333618			-0.301372	0.0530173
ENSG00000177233	chr1	248283734	248285733	OR2M1P	388762	-0.306986	0.0544463
ENSG00000267067	chr17	34989027	34991026			-0.263152	0.0544463
ENSG00000267610	chr19	13181689	13183688			-0.287719	0.0544463
ENSG00000236950	chr1	209144299	209146298		100506899	-0.259902	0.0590179
ENSG00000239131	chr2	143070078	143072077			-0.492728	0.0590179
ENSG00000092345	chr3	16711314	16713313	DAZL	1618	-0.361853	0.0633193
ENSG00000222022	chr2	238333420	238335419			-0.304109	0.0633652
ENSG00000253615	chr8	27759583	27761582			-0.232481	0.0633652
ENSG00000273450	chr10	96074585	96076584			-0.274623	0.0646196
ENSG00000207375	chr15	25335433	25337432	SNORD116-23	100033434	-0.209332	0.0646196
ENSG00000251815	chr15	25343146	25345145	SNORD116-26	100033438	-0.258483	0.0646196
ENSG00000237929	chr20	29899266	29901265	RPL31P3		-0.175812	0.0646196

## Sheet: FaDu_RR_Promoter_hyper
id	Chromosome	Start	End	symbol	entrezID	mean.mean.diff	comb.p.adj.fdr
ENSG00000229385	chr2	79727471	79729470			0.364231	1.13791e-05
ENSG00000246316	chr5	114003608	114005607			0.407719	1.71394e-05
ENSG00000204787	chr2	79365054	79367053	REG1P		0.296859	7.01512e-05
ENSG00000230746	chr7	145377963	145379962			0.518248	7.01512e-05
ENSG00000228595	chr9	94372125	94374124	PAICSP2		0.417669	7.01512e-05
ENSG00000256378	chr12	28088183	28090182			0.437264	7.01512e-05
ENSG00000145632	chr5	57755588	57757587	PLK2	10769	0.210135	7.48464e-05
ENSG00000223202	chr11	74394769	74396768	RN7SKP297		0.293056	7.89633e-05
ENSG00000152932	chr5	57876548	57878547	RAB3C	115827	0.349602	0.000115716
ENSG00000207208	chr14	102268064	102270063	RNU6-790P		0.445144	0.000202755
ENSG00000214988	chr4	83412289	83414288	RPL7AP26		0.413132	0.000264528
ENSG00000223963	chr1	240934335	240936334	PRKRIRP8		0.322408	0.000349946
ENSG00000177335	chr8	144119126	144121125	C8orf31	286122	0.177262	0.000376041
ENSG00000260674	chr15	80034153	80036152			0.3419	0.000376041
ENSG00000270980	chr8	55104096	55106095			0.314412	0.000392349
ENSG00000253128	chr14	107280753	107282752	IGHV4-80		0.166021	0.000392349
ENSG00000247345	chr5	58334088	58336087			0.258016	0.000394563
ENSG00000267480	chr18	12031681	12033680			0.433533	0.000443136
ENSG00000273044	chr22	35921479	35923478			0.293741	0.000527564
ENSG00000249333	chr22	22391542	22393541			0.262984	0.000557594
ENSG00000269051	chr19	53698864	53700863		101930134;101930624	0.176257	0.000671774
ENSG00000258595	chr14	93602911	93604910			0.255367	0.000707308
ENSG00000265414	chr1	8334939	8336938	RN7SL729P		0.229768	0.000736562
ENSG00000249169	chr5	91989055	91991054			0.304694	0.000736562
ENSG00000243864	chr19	33830092	33832091	RPS3AP50		0.0906548	0.000736562
ENSG00000131409	chr19	51070803	51072802	LRRC4B	94030	0.207656	0.000736562
ENSG00000222213	chr5	148985805	148987804	RNU6-588P		0.210737	0.00100523
ENSG00000133028	chr17	10601193	10603192	SCO1	6341	0.250018	0.00101567
ENSG00000207082	chr1	164607302	164609301	RNU6-171P		0.22902	0.00108605
ENSG00000255287	chr11	92669107	92671106	SNRPGP16		0.312374	0.00131351
ENSG00000253310	chr14	107239780	107241779	IGHVIII-76-1		0.256967	0.00131351
ENSG00000259264	chr15	74493546	74495545			0.227186	0.00131351
ENSG00000172208	chr11	48265108	48267107	OR4X2	119764	0.19999	0.00139389
ENSG00000267004	chr19	12836201	12838200			0.295195	0.00141783

## Sheet: FaDu_RR_Promoter_hypo
id	Chromosome	Start	End	symbol	entrezID	mean.mean.diff	comb.p.adj.fdr
ENSG00000267568	chr17	74964739	74966738			-0.288484	9.04991e-06
ENSG00000267248	chr17	58212506	58214505			-0.20862	7.01512e-05
ENSG00000211937	chr14	106494098	106496097	IGHV2-5		-0.258924	0.000248434
ENSG00000253387	chr14	106495497	106497496	IGHVIII-5-1		-0.258924	0.000248434
ENSG00000235470	chr10	105276651	105278650			-0.243278	0.000392349
ENSG00000271299	chr19	41579513	41581512			-0.143469	0.000392349
ENSG00000227011	chr17	51061380	51063379	C17orf112	100506650	-0.208921	0.000397446
ENSG00000252690	chr15	83420136	83422135	SCARNA15	677778	-0.282879	0.000435191
ENSG00000258624	chr15	27584171	27586170			-0.332687	0.000596716
ENSG00000248599	chr8	102062782	102064781		441374	-0.157658	0.000736562
ENSG00000262609	chr17	6226049	6228048	BTF3P14		-0.301594	0.000736562
ENSG00000175857	chr5	57785762	57787761	GAPT	202309	-0.293174	0.000888481
ENSG00000254537	chr11	33423262	33425261			-0.287628	0.00108612
ENSG00000266535	chr17	31437376	31439375			-0.292173	0.00134698
ENSG00000233451	chr10	22648601	22650600			-0.357938	0.00141783
ENSG00000131951	chr14	60384931	60386930	LRRC9		-0.123118	0.00141783
